# Supplementary material for: Impact of Sex on Mortality in Patients Undergoing Surgical Aortic Valve Replacement
Source: MDPI journal article supplement (doi:10.3390/jpm12081203), 2022-07-24
Supplement: s1 [file s1]

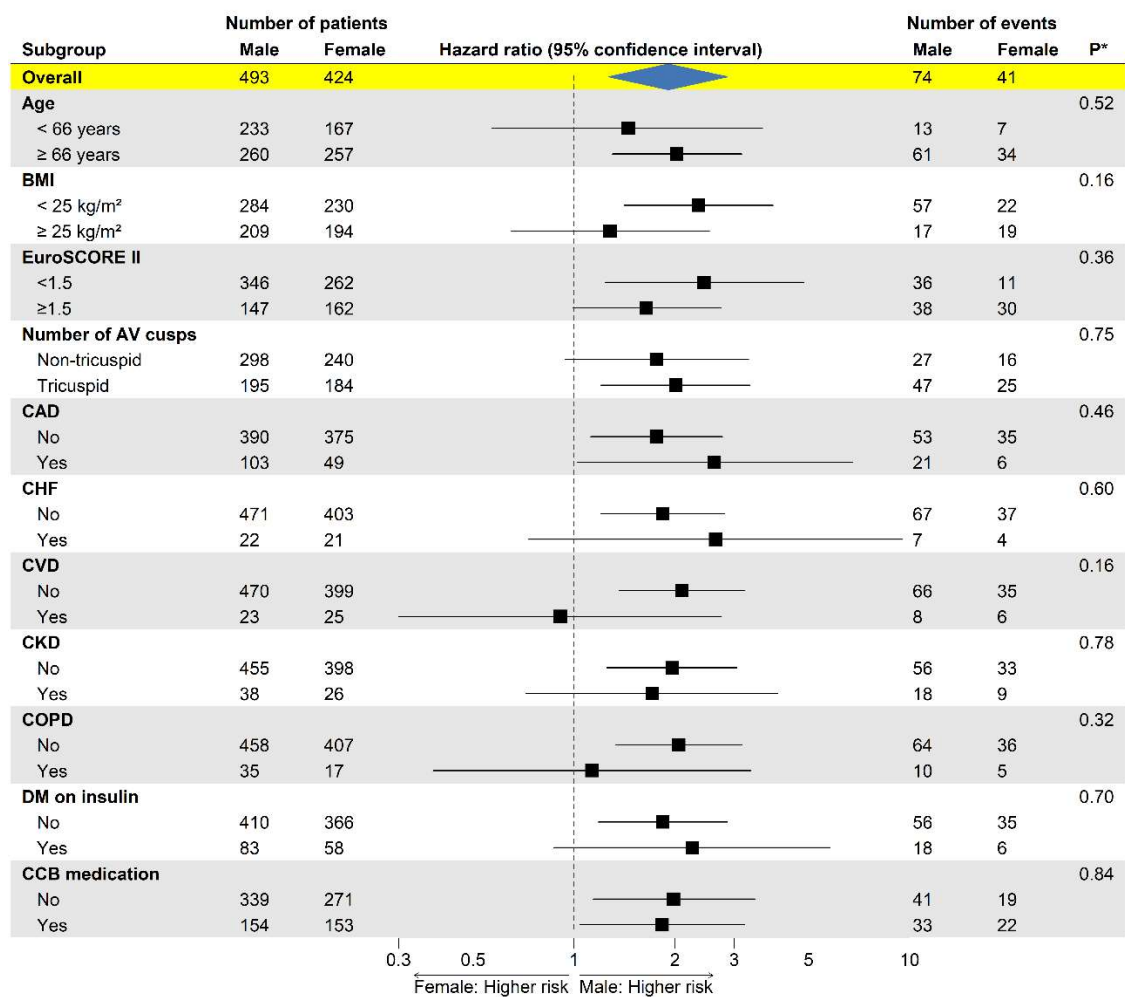

**Figure S1.** Forest plot of subgroup analysis stratified by sex. BMI, body mass index; EuroSCORE II, European system for cardiac operative risk evaluation II; CAD, coronary artery disease; CHF, congestive heart failure; CVD, cerebrovascular disease; CKD, chronic kidney disease; COPD, chronic obstructive pulmonary disease; DM, diabetes mellitus; CCB, calcium channel blocker. P\*: P value for interaction.
